# Supplementary material for: Bovine Abortions Revisited—Enhancing Abortion Diagnostics by 16S rDNA Amplicon Sequencing and Fluorescence in situ Hybridization
Source: PubMed Central journal article supplement (PMC7940352; doi:10.3389/fvets.2021.623666), 2021-02-23
Supplement: Data_Sheet_1.pdf [file Data_Sheet_1.pdf]

# *Supplementary Material*

## **1 Material and methods**

### **1.1 Animals**

Fetal membranes and fetuses or fetal tissue from 153 bovine abortions and 9 stillbirths submitted to the National Veterinary Institute, Denmark, for diagnostics from January 2015 until June 2017 were examined. The material originated from 147 singleton and 15 twin pregnancies. The twin pregnancies were represented by 26 fetuses. The samples included in this study originated from a previous study (1) in which the etiology of abortion was investigated by routine diagnostic methods, i.e. macroscopic and histologic examination, aerobic bacterial culture (fetal lung, liver, abomasal content), and maternal serology for BVDV infection as well as BVDV immunohistochemistry in abortion cases from herds with a BVD-positive status. Each fetus or set of fetal organs counted as a single submission except for twin abortions with both twins submitted, which counted as one submission. Age determination of the fetus was based on insemination and abortion date, anamnestic data, and crown-rump-length (CRL) in decreasing priority (2). In cases lacking data on all of the aforementioned criteria, pulmonary histology was used to estimate fetal age (3). Abortions were categorized as having occurred during first, second or third trimester of gestation, i.e. gestation months  $\leq 3$ , 4-6, and  $\geq 7$ .

### **1.2 Reproduction data**

Information on insemination and abortion dates, breed of the dam as well as number and gestational age of registered bovine abortions in Denmark was retrieved from the Danish Cattle Database (SEGES P/S, Aarhus, Denmark).

### **1.3 Necropsy and histopathological procedures**

The fetuses and placentas were examined as described previously (1). Specimens for histology were collected from placenta, lung, liver, heart, kidney, and brain, fixed in 10% neutral buffered formalin, processed by routine methods, and embedded in paraffin. Tissue sections of 3-5  $\mu\text{m}$  were cut and stained with hematoxylin and eosin (HE). Sections of placental specimens that were suspicious for fungal infection based on histological findings were additionally stained with Grocott's methenamine silver. For PCR and sequencing, specimens from placenta (up to three cotyledons), lung, liver, and

kidney were transferred into sterile plastic containers, frozen at -20 °C for up to 4 weeks and then stored at -80 °C until nucleic acid extraction. Lung and liver specimens were pooled, while kidney and placenta were analyzed separately.

#### **1.4 Bacteriological procedures**

Culturing was carried out as described previously (1). In brief: specimens of liver, lung, and abomasal contents were cultured under aerobic conditions at 37 °C on Columbia agar plates supplemented with 5% calf blood (in house) as well as on Drigalski lactose agar plates (in house). Selection of colonies for subculturing was based on colony morphology and quantity of those colony types that were not considered as post mortem contamination (e.g. *Proteus* spp.) based on the experience of the bacteriologist in charge. In case of mixed bacterial growth, bacteria from the three most numerous and significant colony types were subcultured. If more than three different colony types were present without any significant difference in their organ distribution, bacterial growth was described as an unspecific mixed flora and subculturing was not done. Colony material from the subcultures was analyzed by matrix-assisted laser desorption/ionization time-of-flight mass spectrometry (MALDI-TOF MS) as described previously (1). Lung, liver, and spleen were screened for *Brucella* spp. by culture on selective media (1).

#### **1.5 Diagnostic criteria routine methods**

Based on the diagnostic findings obtained with routine methods, the abortion cases were classified into four groups of diagnostics certainty that were described previously (1). In brief:

*Group 1.* Likely cause of abortion identified. Diagnosis of bacterial infection was based on isolation of bacteria and the presence of lesions consistent with bacterial infection. Mycosis was diagnosed by the presence of hyphae or yeast cells in tissue sections associated with corresponding inflammation. Protozoal abortion was diagnosed by findings of typical non-suppurative inflammation in fetal organs. Infection with BVDV was diagnosed by demonstration of BVDV antigen within fetal tissues.

*Group 2.* Lesions present, specific etiology not identified. This group included cases for which a specific cause was not detected but where lesions were present in the fetus and/or the fetal placenta. Cases were categorized based on the most severe lesion observed.

*Group 3.* Bacteria isolated from at least two organs without corresponding lesions. This group consisted of cases from which potentially pathogenic bacteria were isolated from at least two organs, but without associated lesions.

*Group 4.* No likely cause identified. This group comprised cases without fetal or placental lesions including cases with isolation of bacteria from only one organ, though without associated lesions.

## **1.6 Study population**

During the study period, 20581 bovine abortions were registered in Denmark, whereof the abortion cases from our study comprised 0.8%. Most fetuses from our study (67%) were aborted during the last trimester, while 33% were aborted during the second trimester, and 1% during the first trimester. The distribution of gestational age of all registered abortions during the study period was: 3% first trimester, 20% second trimester, 77% last trimester.

## **2 Abbreviations**

|      |                             |
|------|-----------------------------|
| BVD  | Bovine virus diarrhea       |
| BVDV | Bovine viral diarrhea virus |

### 3 Supplementary tables

**Supplementary Table 1.** Primer and probe sequences used for the detection of *Chlamydiaceae* and *Chlamydiales*.

| Primer or probe name | Target                             | Sequence 5' - 3'                                          | Reference |
|----------------------|------------------------------------|-----------------------------------------------------------|-----------|
| Ch23S-F              | <i>Chlamydiaceae</i> 23S rRNA gene | CTGAAACCAGTAGCTTATAAGCGGT                                 | (4)       |
| Ch23S-R              | <i>Chlamydiaceae</i> 23S rRNA gene | ACCTCGCCGTTTAACTTAACTCC                                   | (4)       |
| Ch23S-p              | <i>Chlamydiaceae</i> 23S rRNA gene | FAM-CTCATCATGCAAAAGGCACGCCG-TAMRA                         | (4)       |
| ACT2-1030-F          | Bovine $\beta$ -actin gene         | AGCGCAAGTACTCCGTGTG                                       | (5)       |
| ACT-1135-R           | Bovine $\beta$ -actin gene         | CGGACTCATCGTACTCCTGCTT                                    | (5)       |
| ACT-p-1081-YAK       | Bovine $\beta$ -actin gene         | YAK-TCGCTGTCCACCTTCCAGCAGATGT-BHQ1                        | (5)       |
| panCh16F2            | <i>Chlamydiales</i> 16S rRNA gene  | CCGCC <u>A</u> ACACTGGGACT <sup>a</sup>                   | (6)       |
| panCh16R2            | <i>Chlamydiales</i> 16S rRNA gene  | GGAGTTAGCCGGTGCTTCTT <u>TAC</u> <sup>a</sup>              | (6)       |
| panCh16S             | <i>Chlamydiales</i> 16S rRNA gene  | FAM-CTACGGGAGGCTGCAGTCG <u>A</u> GAAATC-BHQ1 <sup>a</sup> | (6)       |

BHQ1 = black hole quencher 1, FAM = 6-carboxyfluorescein, TAMRA = 5-carboxytetramethylrhodamin, YAK = Yakima Yellow

<sup>a</sup>The underlined nucleic acids are locked.

**Supplementary Table 2.** Control tissues used for the fluorescence *in situ* hybridization (FISH) screening of aborted tissues for selected bacterial species and fungi in general. All tissues were formalin-fixed and paraffin embedded.

| <b>Control species<br/>(strain/type)</b>               | <b>Tissue</b> | <b>Species</b> | <b>Origin</b>                 |
|--------------------------------------------------------|---------------|----------------|-------------------------------|
| <i>C. abortus</i>                                      | placenta      | ovine          | spontaneous infection         |
| <i>C. burnetii</i>                                     | placenta      | bovine         | spontaneous infection         |
| <i>C. jejuni</i> subsp. <i>jejuni</i><br>(ATCC 33560T) | lung          | porcine        | injected control <sup>a</sup> |
| <i>C. pecorum</i>                                      | intestine     | bovine         | spontaneous infection         |
| <i>B. licheniformis</i>                                | lung          | murine         | experimental infection        |
| <i>E. coli</i> (serotype O138)                         | lung          | porcine        | injected control              |
| <i>E. coli</i> (ATCC 25922)                            | liver         | mouse          | experimental infection        |
| <i>L. monocytogenes</i> field<br>isolate               | liver         | chinchilla     | spontaneous infection         |
| <i>T. pyogenes</i> field isolate                       | lung          | porcine        | injected control              |
| Fungus with septate hyphae                             | placenta      | cattle         | spontaneous infection         |

<sup>a</sup>Pure bacterial cultures suspended in a 0.9% sterile saline solution were injected into sterile porcine lung samples. The tissue was then fixed in 10% neutral buffered formalin, processed routinely, embedded in paraffin, and cut into of 3-5 µm sections.

**Supplementary Table 3.** Diagnoses and results of bacterial culture, 16S rDNA amplicon sequencing, fluorescence *in situ* hybridization (FISH), and histology for bovine abortion cases that were FISH-screened for *Bacillus licheniformis* lesion association.

| Case ID | Culture <i>B. licheniformis</i> ≥1 organ | Sequencing >10,000 <i>B. licheniformis</i> reads placenta | Sequencing <i>B. licheniformis</i> in extraction control | Sequencing <i>B. licheniformis</i> among 3 most abundant placenta | Sequencing <i>B. licheniformis</i> among 3 most abundant lung-liver | Sequencing most abundant placenta  | Sequencing most abundant lung-liver | FISH <i>B. licheniformis</i> detected | FISH <i>B. licheniformis</i> lesion-associated | Histopathological findings                                     | Previous etiology       | Final etiology                              |
|---------|------------------------------------------|-----------------------------------------------------------|----------------------------------------------------------|-------------------------------------------------------------------|---------------------------------------------------------------------|------------------------------------|-------------------------------------|---------------------------------------|------------------------------------------------|----------------------------------------------------------------|-------------------------|---------------------------------------------|
| Case 1  | +                                        | +                                                         | -                                                        | +                                                                 | -                                                                   | <i>Fusobacterium periodonticum</i> | <i>Psychrobacter</i> unclassified   | +                                     | +                                              | suppurative placentitis<br>suppurative bronchopneumonia        | <i>B. licheniformis</i> | <i>B. licheniformis</i>                     |
| Case 2  | +                                        | +                                                         | -                                                        | +                                                                 | +                                                                   | <i>Acinetobacter johnsonii</i>     | <i>B. licheniformis</i>             | +                                     | +                                              | necrosuppurative placentitis                                   | unknown                 | <i>B. licheniformis</i>                     |
| Case 3  | -                                        | +                                                         | -                                                        | +                                                                 | -                                                                   | <i>B. licheniformis</i>            | <i>Kurthia gibsonii</i>             | +                                     | +                                              | necrosuppurative placentitis                                   | unknown                 | <i>B. licheniformis</i> ,<br><i>E. coli</i> |
| Case 4  | -                                        | +                                                         | -                                                        | +                                                                 | -                                                                   | <i>B. licheniformis</i>            | <i>Shigella sonnei</i>              | +                                     | +                                              | fibrinonecrotizing placentitis<br>suppurative bronchopneumonia | unknown                 | <i>B. licheniformis</i>                     |

- = no/negative; + = yes/positive.

**Supplementary Table 4.** Diagnoses and results of 16S rDNA amplicon sequencing, fluorescence *in situ* hybridization (FISH), and histology for bovine abortion cases that were FISH-screened for *Coxiella burnetii* lesion association.

| Case ID | Sequencing <i>C. burnetii</i> reads | Sequencing <i>C. burnetii</i> in extraction control | Sequencing <i>C. burnetii</i> among 3 most abundant placenta | Sequencing <i>C. burnetii</i> among 3 most abundant lung-liver | Sequencing most abundant placenta | Sequencing most abundant lung-liver | FISH <i>C. burnetii</i> detected | FISH <i>C. burnetii</i> lesion-associated | Histopathological findings                                                                                              | Previous etiology            | Final etiology               |
|---------|-------------------------------------|-----------------------------------------------------|--------------------------------------------------------------|----------------------------------------------------------------|-----------------------------------|-------------------------------------|----------------------------------|-------------------------------------------|-------------------------------------------------------------------------------------------------------------------------|------------------------------|------------------------------|
| Case 5  | +                                   | -                                                   | -                                                            | -                                                              | <i>Clostridium sordellii</i>      | <i>Vibrio vulnificus</i>            | -                                | -                                         | suppurative bronchopneumonia                                                                                            | <i>Klebsiella pneumoniae</i> | <i>Klebsiella pneumoniae</i> |
| Case 6  | +                                   | -                                                   | -                                                            | -                                                              | <i>T. pyogenes</i>                | <i>T. pyogenes</i>                  | -                                | -                                         | suppurative bronchopneumonia                                                                                            | <i>T. pyogenes</i>           | <i>T. pyogenes</i>           |
| Case 7  | +                                   | -                                                   | -                                                            | -                                                              | <i>Facklamia</i> unclassified     | <i>Facklamia</i> unclassified       | -                                | -                                         | necrosuppurative placentitis<br>suppurative bronchopneumonia<br>non-suppurative hepatitis<br>non-suppurative meningitis | unknown                      | unknown                      |

- = no/negative; + = yes/positive.



**Supplementary Table 5.** Diagnoses and results of 16S rDNA amplicon sequencing, fluorescence *in situ* hybridization (FISH), and histology for bovine abortion cases that were FISH-screened for *Campylobacter jejuni* lesion association.

| Case ID | Sequencing <i>C. jejuni</i> | Sequencing <i>C. jejuni</i> among 3 most abundant placenta | Sequencing <i>C. jejuni</i> among 3 most abundant lung-liver | Sequencing <i>C. jejuni</i> in extraction control | Sequencing most abundant placenta | Sequencing highest reads lung-liver | FISH <i>C. jejuni</i> detected | FISH <i>C. jejuni</i> lesion-associated | Histopathological findings | Previous etiology | Final etiology |
|---------|-----------------------------|------------------------------------------------------------|--------------------------------------------------------------|---------------------------------------------------|-----------------------------------|-------------------------------------|--------------------------------|-----------------------------------------|----------------------------|-------------------|----------------|
| Case 8  | +                           | -                                                          | +                                                            | -                                                 | <i>E. coli</i>                    | <i>C. jejuni</i>                    | -                              | -                                       | suppurative placentitis    | unknown           | <i>E. coli</i> |

- = no/negative; + = yes/positive.

**Supplementary Table 6.** Diagnoses and results of bacterial culture, 16S rDNA amplicon sequencing, fluorescence *in situ* hybridization (FISH), and histology for bovine abortion cases that were FISH-screened for *Escherichia coli* lesion association.

| Case ID | Pure culture <i>E. coli</i> ≥1 organ | Sequencing >20,000 <i>E. coli</i> reads placenta <sup>a</sup> | Sequencing <i>E. coli</i> in extraction control | Sequencing <i>E. coli</i> among 3 most abundant placenta | Sequencing <i>E. coli</i> among 3 most abundant lung-liver | Sequencing most abundant placenta | Sequencing most abundant lung-liver | FISH <i>E. coli</i> detected | FISH <i>E. coli</i> lesion - associated | Histopathological findings                                                                           | Previous etiology               | Final etiology                              |
|---------|--------------------------------------|---------------------------------------------------------------|-------------------------------------------------|----------------------------------------------------------|------------------------------------------------------------|-----------------------------------|-------------------------------------|------------------------------|-----------------------------------------|------------------------------------------------------------------------------------------------------|---------------------------------|---------------------------------------------|
| Case 3  | +                                    | -                                                             | -                                               | -                                                        | -                                                          | <i>B. licheniformis</i>           | <i>Kurthia gibsonii</i>             | +                            | +                                       | necrosuppurative placentitis                                                                         | unknown                         | <i>B. licheniformis</i> ,<br><i>E. coli</i> |
| Case 8  | -                                    | +                                                             | +                                               | +                                                        | -                                                          | <i>E. coli</i>                    | <i>C. jejuni</i>                    | +                            | +                                       | suppurative placentitis                                                                              | unknown                         | <i>E. coli</i>                              |
| Case 9  | -                                    | +                                                             | -                                               | +                                                        | -                                                          | <i>E. coli</i>                    | <i>Aerococcus viridans</i>          | -                            | -                                       | suppurative placentitis<br>suppurative bronchopneumonia                                              | unknown                         | unknown                                     |
| Case 10 | +                                    | -                                                             | +                                               | -                                                        | -                                                          | <i>Gemella</i>                    | <i>Gemella</i>                      | +                            | +                                       | suppurative placentitis                                                                              | non-hemolytic<br><i>E. coli</i> | <i>E. coli</i>                              |
| Case 11 | +                                    | -                                                             | -                                               | -                                                        | -                                                          | <i>Streptococcus plurimalius</i>  | <i>Clostridium bifermentans</i>     | +                            | -                                       | non-suppurative necrotizing encephalitis<br>non-suppurative myocarditis<br>non-suppurative hepatitis | <i>N. caninum</i>               | <i>N. caninum</i>                           |

|         |   |   |   |    |   |                                     |                                 |   |   |                                                                                      |                                 |                |
|---------|---|---|---|----|---|-------------------------------------|---------------------------------|---|---|--------------------------------------------------------------------------------------|---------------------------------|----------------|
| Case 12 | + | - | - | -  | - | <i>Streptococcus dysgalactiae</i>   | <i>Clostridium sordellii</i>    | + | + | suppurative placentitis<br>suppurative epicarditis                                   | non-hemolytic<br><i>E. coli</i> | <i>E. coli</i> |
| Case 13 | + | - | - | -  | - | <i>Clostridium bifermentans</i>     | <i>Romboutsia lituseburens</i>  | + | - | necrosuppurative placentitis<br>suppurative bronchopneumonia                         | non-hemolytic<br><i>E. coli</i> | unknown        |
| Case 14 | + | - | - | NA | - | NA                                  | <i>Enterobacter hormaechei</i>  | + | - | suppurative bronchopneumonia                                                         | non-hemolytic<br><i>E. coli</i> | unknown        |
| Case 15 | + | - | - | NA | - | NA                                  | <i>Haemophilus influenzae</i>   | - | - | suppurative bronchopneumonia<br>non-suppurative hepatitis<br>suppurative myocarditis | unknown                         | unknown        |
| Case 16 | - | + | - | +  | + | <i>E. coli</i>                      | <i>E. coli</i>                  | + | + | necrosuppurative and fibrinous placentitis<br>suppurative bronchopneumonia           | unknown                         | <i>E. coli</i> |
| Case 17 | + | - | + | -  | - | <i>Peptostreptococcus russellii</i> | <i>Clostridium bifermentans</i> | + | - | suppurative placentitis                                                              | unknown                         | unknown        |
| Case 18 | - | + | + | +  | - | <i>E. coli</i>                      | <i>Proteus mirabilis</i>        | - | - | suppurative bronchopneumonia<br>suppurative epicarditis<br>suppurative hepatitis     | unknown                         | unknown        |

|         |   |   |   |    |   |                                |                                   |   |   |                                                                                                                                      |                   |                                       |
|---------|---|---|---|----|---|--------------------------------|-----------------------------------|---|---|--------------------------------------------------------------------------------------------------------------------------------------|-------------------|---------------------------------------|
| Case 19 | - | + | - | +  | + | <i>E. coli</i>                 | <i>Acinetobacter unclassified</i> | + | + | suppurative placentitis                                                                                                              | unknown           | <i>E. coli</i>                        |
| Case 20 | - | + | - | +  | - | <i>E. coli</i>                 | <i>Acinetobacter baumannii</i>    | + | + | necrosuppurative placentitis<br>suppurative bronchopneumonia                                                                         | unknown           | <i>E. coli</i>                        |
| Case 21 | - | + | - | +  | - | <i>Clostridium perfringens</i> | <i>Acinetobacter baumannii</i>    | + | - | suppurative placentitis<br>suppurative bronchopneumonia                                                                              | unknown           | unknown                               |
| Case 22 | + | - | - | NA | - | NA                             | <i>Facklamia unclassified</i>     | - | - | non-suppurative myocarditis<br>non-suppurative necrotizing encephalitis                                                              | <i>N. caninum</i> | <i>N. caninum</i>                     |
| Case 23 | + | + | - | +  | - | <i>E. coli</i>                 | <i>Acinetobacter unclassified</i> | + | + | necrotizing placentitis<br>non-suppurative myocarditis<br>non-suppurative hepatitis                                                  | <i>N. caninum</i> | <i>N. caninum</i> ,<br><i>E. coli</i> |
| Case 24 | - | + | + | +  | - | <i>E. coli</i>                 | <i>Aerococcus viridans</i>        | + | - | necrosuppurative placentitis<br>non-suppurative myocarditis<br>non-suppurative hepatitis<br>non-suppurative necrotizing encephalitis | <i>N. caninum</i> | <i>N. caninum</i>                     |

|         |   |   |   |   |   |                                  |                                  |   |   |                                                                                                                                                                  |                   |                   |
|---------|---|---|---|---|---|----------------------------------|----------------------------------|---|---|------------------------------------------------------------------------------------------------------------------------------------------------------------------|-------------------|-------------------|
| Case 25 | + | - | - | - | - | <i>Bacteroides unclassified</i>  | <i>Clostridium butyricum</i>     | + | - | suppurative placentitis                                                                                                                                          | unknown           | unknown           |
| Case 26 | - | + | - | + | - | <i>Streptococcus equinus</i>     | <i>Fusobacterium necrophorum</i> | + | - | non-suppurative necrotizing placentitis<br>non-suppurative myocarditis<br>non-suppurative hepatitis<br>non-suppurative necrotizing encephalitis                  | <i>N. caninum</i> | <i>N. caninum</i> |
| Case 27 | + | + | - | + | + | <i>Streptococcus plurimalium</i> | <i>E. coli</i>                   | + | - | non-suppurative placentitis<br>non-suppurative myocarditis<br>non-suppurative hepatitis<br>non-suppurative necrotizing encephalitis<br>non-suppurative nephritis | <i>N. caninum</i> | <i>N. caninum</i> |

- = no/negative; + = yes/positive.

<sup>a</sup>If placenta was not available, the number of reads from the lung-liver pool or lung were assessed.

**Supplementary Table 7.** Diagnoses and results of 16S rDNA amplicon sequencing, fluorescence *in situ* hybridization (FISH), and histology for bovine abortion cases that were FISH-screened for *Fusobacterium necrophorum* lesion association.

| Case ID | Sequencing >10,000 <i>F. necrophorum</i> reads | Sequencing <i>F. necrophorum</i> in extraction control | Sequencing <i>F. necrophorum</i> among 3 most abundant placenta | Sequencing <i>F. necrophorum</i> among 3 most abundant lung-liver | Sequencing most abundant placenta | Sequencing most abundant lung-liver | FISH <i>F. necrophorum</i> detected | FISH <i>F. necrophorum</i> lesion-associated | Histopathological findings                                                                          | Previous etiology               | Final etiology     |
|---------|------------------------------------------------|--------------------------------------------------------|-----------------------------------------------------------------|-------------------------------------------------------------------|-----------------------------------|-------------------------------------|-------------------------------------|----------------------------------------------|-----------------------------------------------------------------------------------------------------|---------------------------------|--------------------|
| Case 12 | +                                              | -                                                      | +                                                               | -                                                                 | <i>Streptococcus dysgalactiae</i> | <i>Clostridium sordellii</i>        | +                                   | -                                            | suppurative placentitis<br>suppurative epicarditis                                                  | non-hemolytic<br><i>E. coli</i> | <i>E. coli</i>     |
| Case 28 | +                                              | -                                                      | +                                                               | -                                                                 | <i>Bacteroides</i> unclassified   | <i>Lactococcus</i> unclassified     | +                                   | -                                            | necrosuppurative placentitis<br>suppurative bronchopneumonia                                        | unknown                         | <i>T. pyogenes</i> |
| Case 29 | +                                              | -                                                      | +                                                               | -                                                                 | <i>F. necrophorum</i>             | <i>Streptococcus equinus</i>        | +                                   | -                                            | non-suppurative placentitis<br>non-suppurative myocarditis<br>non-suppurative necrotizing hepatitis | <i>N. caninum</i>               | <i>N. caninum</i>  |

|         |   |   |   |   |                       |                                 |   |   |                                                                                                                                                             |                   |                    |
|---------|---|---|---|---|-----------------------|---------------------------------|---|---|-------------------------------------------------------------------------------------------------------------------------------------------------------------|-------------------|--------------------|
|         |   |   |   |   |                       |                                 |   |   | non-suppurative<br>encephalitis                                                                                                                             |                   |                    |
| Case 30 | + | - | + | - | <i>F. necrophorum</i> | <i>Lactococcus unclassified</i> | + | - | non-suppurative<br>necrotizing placentitis<br>non-suppurative<br>myocarditis<br>non-suppurative hepatitis<br>non-suppurative<br>necrotizing encephalitis    | <i>N. caninum</i> | <i>N. caninum</i>  |
| Case 31 | + | - | + | - | <i>F. necrophorum</i> | <i>Lactococcus lactis</i>       | + | - | suppurative placentitis                                                                                                                                     | unknown           | unknown            |
| Case 32 | + | - | + | - | <i>F. necrophorum</i> | <i>Staphylococcus equorum</i>   | + | - | non-suppurative<br>placentitis<br>non-suppurative<br>myocarditis<br>non-suppurative<br>necrotizing hepatitis<br>non-suppurative<br>necrotizing encephalitis | <i>N. caninum</i> | <i>N. caninum</i>  |
| Case 33 | + | - | + | - | <i>T. pyogenes</i>    | <i>Enterococcus durans</i>      | + | - | necrosuppurative<br>placentitis<br>suppurative<br>bronchopneumonia                                                                                          | unknown           | <i>T. pyogenes</i> |

---

non-suppurative

encephalitis

---

- = no/negative; + = yes/positive.



**Supplementary Table 8.** Diagnoses and results of bacterial culture, 16S rDNA amplicon sequencing, fluorescence *in situ* hybridization (FISH), and histology for bovine abortion cases that were FISH-screened for *Listeria monocytogenes* lesion association.

| Case ID | Culture                 | Sequencing    | Sequencing                                    | Sequenc                        | Sequenc                        | Sequenc                        | Sequenc                        | FISH                             | FISH                                      | Histopathological                                       | Previous                | Final                   |
|---------|-------------------------|---------------|-----------------------------------------------|--------------------------------|--------------------------------|--------------------------------|--------------------------------|----------------------------------|-------------------------------------------|---------------------------------------------------------|-------------------------|-------------------------|
|         | <i>L. monocytogenes</i> | >10,000 reads | <i>L. monocytogenes</i> in extraction control | ing                            | ing                            | ing                            | ing                            | <i>L. monocytogenes</i> detected | <i>L. monocytogenes</i> lesion-associated | findings                                                | etiology                | etiology                |
|         |                         |               |                                               | most abundant among 3 placenta | most abundant among 3 placenta | most abundant among 3 placenta | most abundant among 3 placenta |                                  |                                           |                                                         |                         |                         |
| Case 34 | +                       | +             | -                                             | +                              | +                              | <i>L. monocytogenes</i>        | <i>L. monocytogenes</i>        | +                                | +                                         | suppurative placentitis<br>non-suppurative encephalitis | <i>L. monocytogenes</i> | <i>L. monocytogenes</i> |
| Case 35 | +                       | +             | -                                             | +                              | +                              | <i>L. monocytogenes</i>        | <i>L. monocytogenes</i>        | +                                | +                                         | necrosuppurative placentitis                            | <i>L. monocytogenes</i> | <i>L. monocytogenes</i> |

- = no/negative; + = yes/positive.

**Supplementary Table 9.** Diagnoses and results of bacterial culture, 16S rDNA amplicon sequencing, fluorescence *in situ* hybridization (FISH), and histology for bovine abortion cases that were FISH-screened for *Staphylococcus aureus* lesion association.

| Case ID | Culture                   | Sequencing                     | Sequencing                             | Sequencing                                      | Sequencing                                        | Sequencing                         | Sequencing                         | FISH                      | FISH                               | Histopathological findings                              | Routine etiology | Final etiology   |
|---------|---------------------------|--------------------------------|----------------------------------------|-------------------------------------------------|---------------------------------------------------|------------------------------------|------------------------------------|---------------------------|------------------------------------|---------------------------------------------------------|------------------|------------------|
|         | <i>S. aureus</i> ≥1 organ | >10,000 <i>S. aureus</i> reads | <i>S. aureus</i> in extraction control | <i>S. aureus</i> among 3 most abundant placenta | <i>S. aureus</i> among 3 most abundant lung-liver | most abundant placenta             | most abundant lung-liver           | <i>S. aureus</i> detected | <i>S. aureus</i> lesion-associated |                                                         |                  |                  |
| Case 36 | +                         | +                              | -                                      | +                                               | -                                                 | <i>S. aureus</i>                   | <i>Psychrobacter psychrophilus</i> | +                         | +                                  | necrotising placentitis<br>portal hepatitis             | <i>S. aureus</i> | <i>S. aureus</i> |
| Case 37 | +                         | -                              | -                                      | -                                               | -                                                 | <i>Psychrobacter psychrophilus</i> | <i>Staphylococcus equorum</i>      | -                         | -                                  | non-suppurative placentitis                             | unknown          | unknown          |
| Case 38 | +                         | +                              | -                                      | +                                               | +                                                 | <i>S. aureus</i>                   | <i>S. aureus</i>                   | +                         | +                                  | suppurative placentitis<br>non-suppurative encephalitis | <i>S. aureus</i> | <i>S. aureus</i> |
| Case 39 | +                         | +                              | -                                      | +                                               | +                                                 | <i>S. aureus</i>                   | <i>S. aureus</i>                   | +                         | +                                  | suppurative placentitis                                 | <i>S. aureus</i> | <i>S. aureus</i> |

- = no/negative; + = yes/positive.

## 4 References

1. Wolf-Jäckel GA, Hansen MS, Larsen G, Holm E, Agerholm JS, Jensen TK. Diagnostic studies of abortion in Danish cattle 2015-2017. *Acta Vet Scand* (2020) **62**:1. doi:10.1186/s13028-019-0499-4
2. University of Wisconsin. Bovine crown-rump-length calculator. Available at: [http://www.ansci.wisc.edu/jjp1/ansci\\_repro/lab/lab12\\_03/crown-rump\\_analysis3.html](http://www.ansci.wisc.edu/jjp1/ansci_repro/lab/lab12_03/crown-rump_analysis3.html) [Accessed August 15, 2018]
3. Schnorr B. “Entwicklung der Atmungsorgane [Development of the respiratory system],” in *Embryologie der Haustiere* (Ferdinand Enke).
4. Ehrlich R, Slickers P, Goellner S, Hotzel H, Sachse K. Optimized DNA microarray assay allows detection and genotyping of single PCR-amplifiable target copies. *Mol Cell Probes* (2006) **20**:60–63. doi:10.1016/j.mcp.2005.09.003
5. Wernike K, Hoffmann B, Kalthoff D, König P, Beer M. Development and validation of a triplex real-time PCR assay for the rapid detection and differentiation of wild-type and glycoprotein E-deleted vaccine strains of Bovine herpesvirus type 1. *J Virol Methods* (2011) **174**:77–84. doi:10.1016/j.jviromet.2011.03.028
6. Lienard J, Croxatto A, Aeby S, Jatton K, Posfay-barbe K, Gervais A, Greub G. Development of a new *Chlamydiales*-specific real-time PCR and its application to respiratory clinical samples. (2011) **49**:2637–2642. doi:10.1128/JCM.00114-11
